# Supplementary material for: HeLa-CCL2 cell heterogeneity studied by single-cell DNA and RNA sequencing
Source: PLoS One. 2019 Dec 2;14(12):e0225466. doi: 10.1371/journal.pone.0225466 (PMC6886862; doi:10.1371/journal.pone.0225466)
Supplement: S1 Table — A-E represented 5 karyotype stain sheets. (XLSX) [file pone.0225466.s003.xlsx]

## Sheet: 工作表1
						HeLa A	HeLa B	HeLa C	HeLa D	HeLa E
						41	58	67	63	68
						42	58	61	67	65
						45	60	60	66	67
						53	66	136	67	68
						54	61	62	67	65
						55	64	68	56	66
						59	64	116	65	65
						60	60	65	64	66
						60	127	67	68	66
						61	62	67	66	67
						62	66	65	67	67
						62	62	69	66	67
						62	58	67	65	61
						62	66	67	60	65
						62	47	65	67	68
						63	63	68	67	67
						63	62	68	67	65
						63	68	66	63	66
						63	64	68	67	67
						64	66	67	66	66
						64	67	66	60	64
						64	64	67	69	67
						64	67	68	62	67
						64	68	65	63	63
						64	62	67	65	64
						65	61	68	63	65
						66	61	69	63	67
						67	67	134	135	65
						128	63	66	66	131
						128	47	50	67	65
																																															47	63	62
[truncated: 43 more columns]
